# Supplementary material for: Discrimination between Asian populations of the parasitoid wasp Ganaspis cf. brasiliensis using a simple MALDI-TOF MS-based method for use with insects
Source: PubMed Central journal article supplement (PMC7206448; doi:10.1093/biomethods/bpz002), 2019-03-18
Supplement: bpz002_supp.pdf [file bpz002_supp.pdf]

## Supplementary material

**Table S1** Average Bruker score against quadruplicate reference spectra from populations of *Ganaspis cf. brasiliensis* (originally collected from Tokyo and Hasuike in Japan, and Dali and Ximing in China) using Method 1 (described in the methods section). The highest average Bruker score is given as the identification call in the penultimate column, and the accuracy of this after unblinding the data is shown the final column.

| Blind-test number | Average Bruker score against quadruplicate reference spectra for populations from |         |       |        | Identification call | Correct or incorrect?    |
|-------------------|-----------------------------------------------------------------------------------|---------|-------|--------|---------------------|--------------------------|
|                   | Dali                                                                              | Hasuike | Tokyo | Ximing |                     |                          |
| 1                 | 1.852                                                                             | 2.345   | 1.725 | 1.608  | Hasuike             | Correct                  |
| 2                 | 2.381                                                                             | 1.711   | 2.381 | 2.333  | Dali/Tokyo          | Partially correct (Dali) |
| 3                 | 2.406                                                                             | 1.762   | 2.360 | 2.117  | Dali                | Incorrect (Tokyo)        |
| 4                 | 2.347                                                                             | 1.611   | 2.164 | 2.535  | Ximing              | Correct                  |
| 5                 | 1.790                                                                             | 2.242   | 1.583 | 1.592  | Hasuike             | Correct                  |
| 6                 | 1.731                                                                             | 2.191   | 1.727 | 1.607  | Hasuike             | Correct                  |
| 7                 | 2.375                                                                             | 1.663   | 2.312 | 2.445  | Ximing              | Correct                  |
| 8                 | 2.466                                                                             | 1.738   | 2.215 | 2.205  | Dali                | Correct                  |
| 9                 | 1.733                                                                             | 2.424   | 1.746 | 1.679  | Hasuike             | Correct                  |
| 10                | 2.435                                                                             | 1.749   | 2.174 | 2.175  | Dali                | Correct                  |
| 11                | 2.337                                                                             | 1.603   | 2.191 | 2.466  | Ximing              | Correct                  |
| 12                | 2.523                                                                             | 1.688   | 2.321 | 2.375  | Dali                | Correct                  |
| 13                | 2.356                                                                             | 1.682   | 1.992 | 2.378  | Ximing              | Correct                  |
| 14                | 1.813                                                                             | 2.294   | 1.803 | 1.560  | Hasuike             | Correct                  |
| 15                | 2.210                                                                             | 1.693   | 2.410 | 2.044  | Tokyo               | Correct                  |
| 16                | 2.257                                                                             | 1.776   | 2.329 | 2.016  | Tokyo               | Correct                  |
| 17                | 2.232                                                                             | 1.634   | 2.073 | 2.007  | Dali                | Incorrect (Tokyo)        |
| 18                | 2.394                                                                             | 1.768   | 2.200 | 2.383  | Dali                | Incorrect (Ximing)       |
| 19                | 2.379                                                                             | 1.742   | 2.129 | 2.316  | Dali                | Incorrect (Ximing)       |
| 20                | 1.805                                                                             | 2.437   | 1.785 | 1.763  | Hasuike             | Correct                  |
| 21                | 2.405                                                                             | 1.867   | 2.255 | 2.387  | Dali                | Correct                  |
| 22                | 2.304                                                                             | 1.795   | 2.439 | 2.148  | Tokyo               | Correct                  |
| 23                | 2.284                                                                             | 1.475   | 2.256 | 2.245  | Dali                | Correct                  |
| 24                | 2.341                                                                             | 1.801   | 2.448 | 2.166  | Tokyo               | Correct                  |

**Table S2** Data from Table 1 reorganised according to the populations of the test samples.

| Correct identity | Repeat-test number | Average Bruker score against quadruplicate reference spectra for populations from |         |       |        |
|------------------|--------------------|-----------------------------------------------------------------------------------|---------|-------|--------|
|                  |                    | Dali                                                                              | Hasuike | Tokyo | Ximing |
| Dali             | 2                  | 2.499                                                                             | 1.735   | 2.409 | 2.419  |
| Dali             | 12                 | 2.476                                                                             | 1.595   | 2.406 | 2.373  |
| Dali             | 14                 | 2.506                                                                             | 1.781   | 2.373 | 2.436  |
| Dali             | 17                 | 2.528                                                                             | 1.714   | 2.424 | 2.419  |
| Dali             | 27                 | 2.471                                                                             | 1.769   | 2.284 | 2.467  |
| Dali             | 29                 | 2.524                                                                             | 1.779   | 2.414 | 2.449  |
| Hasuike          | 1                  | 1.788                                                                             | 2.376   | 1.742 | 1.826  |
| Hasuike          | 9                  | 1.696                                                                             | 2.384   | 1.672 | 1.651  |
| Hasuike          | 10                 | 1.784                                                                             | 2.156   | 1.819 | 1.762  |
| Hasuike          | 13                 | 1.844                                                                             | 2.509   | 1.887 | 1.810  |
| Hasuike          | 20                 | 1.843                                                                             | 2.269   | 1.800 | 1.828  |
| Hasuike          | 26                 | 1.795                                                                             | 2.424   | 1.762 | 1.799  |
| Tokyo            | 3                  | 2.439                                                                             | 1.830   | 2.575 | 2.375  |
| Tokyo            | 21                 | 2.385                                                                             | 1.856   | 2.565 | 2.377  |

|        |    |       |       |       |       |
|--------|----|-------|-------|-------|-------|
| Tokyo  | 22 | 2.302 | 1.641 | 2.461 | 2.236 |
| Tokyo  | 23 | 2.365 | 1.800 | 2.510 | 2.266 |
| Tokyo  | 28 | 2.379 | 1.735 | 2.404 | 2.290 |
| Tokyo  | 30 | 2.461 | 1.771 | 2.617 | 2.427 |
| Ximing | 8  | 2.450 | 1.693 | 2.247 | 2.597 |
| Ximing | 11 | 2.415 | 1.757 | 2.287 | 2.423 |
| Ximing | 15 | 2.500 | 1.814 | 2.280 | 2.514 |
| Ximing | 19 | 2.437 | 1.735 | 2.301 | 2.529 |
| Ximing | 24 | 2.452 | 1.725 | 2.293 | 2.543 |
| Ximing | 25 | 2.491 | 1.826 | 2.339 | 2.561 |

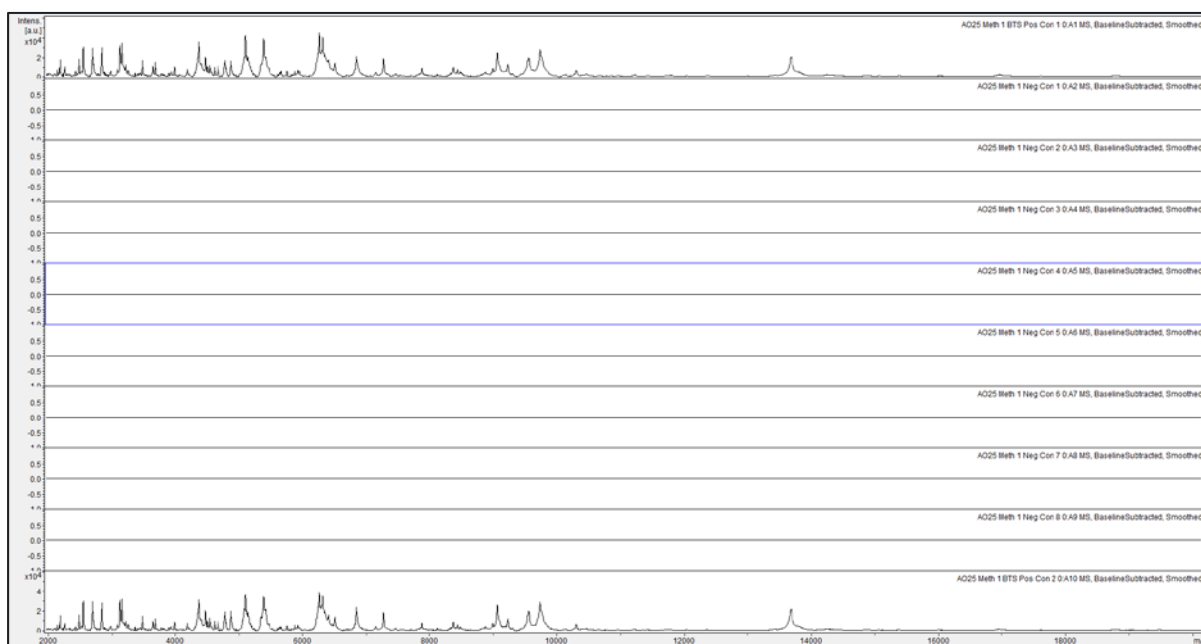

**Figure S1** Method 1 MALDI-TOF MS control spectra with, from top to bottom, BTS positive control #1, negative controls 1-8, and BTS positive control #2. Spectra are shown baseline-subtracted, smoothed, with y-axis scaling between -2,000 and 60,000 Bruker intensity units, and covering the mass range 2 kDa to 20 kDa (with x-axis scale increments of 2 kDa).

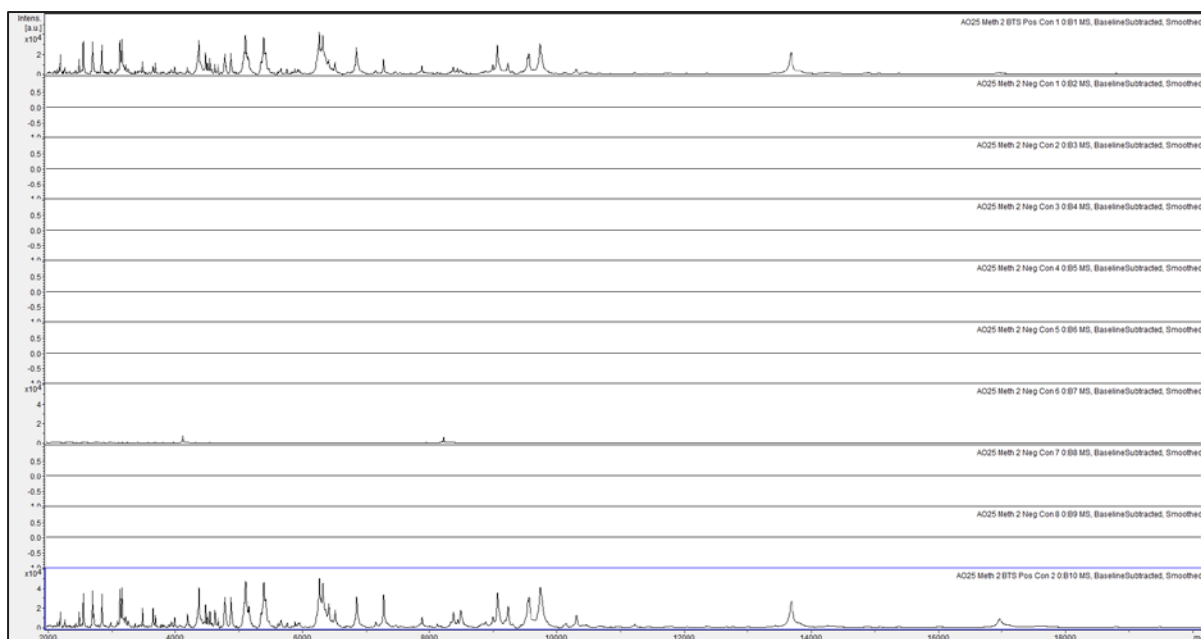

**Figure S2** Method 2 MALDI-TOF MS control spectra with, from top to bottom, BTS positive control #1, negative controls 1-8, and BTS positive control #2. Spectra are shown baseline-subtracted, smoothed, with y-axis scaling between -2,000 and 60,000 Bruker intensity units, and covering the mass range 2 kDa to 20 kDa (with x-axis scale increments of 2 kDa). Two small peaks were obtained for negative control #6 using Method 2.
